# Supplementary material
Source: Springer Nature journal article supplement (https://www.springermedizin.de/resource/supplementary/13601_2013_646_MOESM5_ESM.pdf/9677908)

# On-going management of established asthma

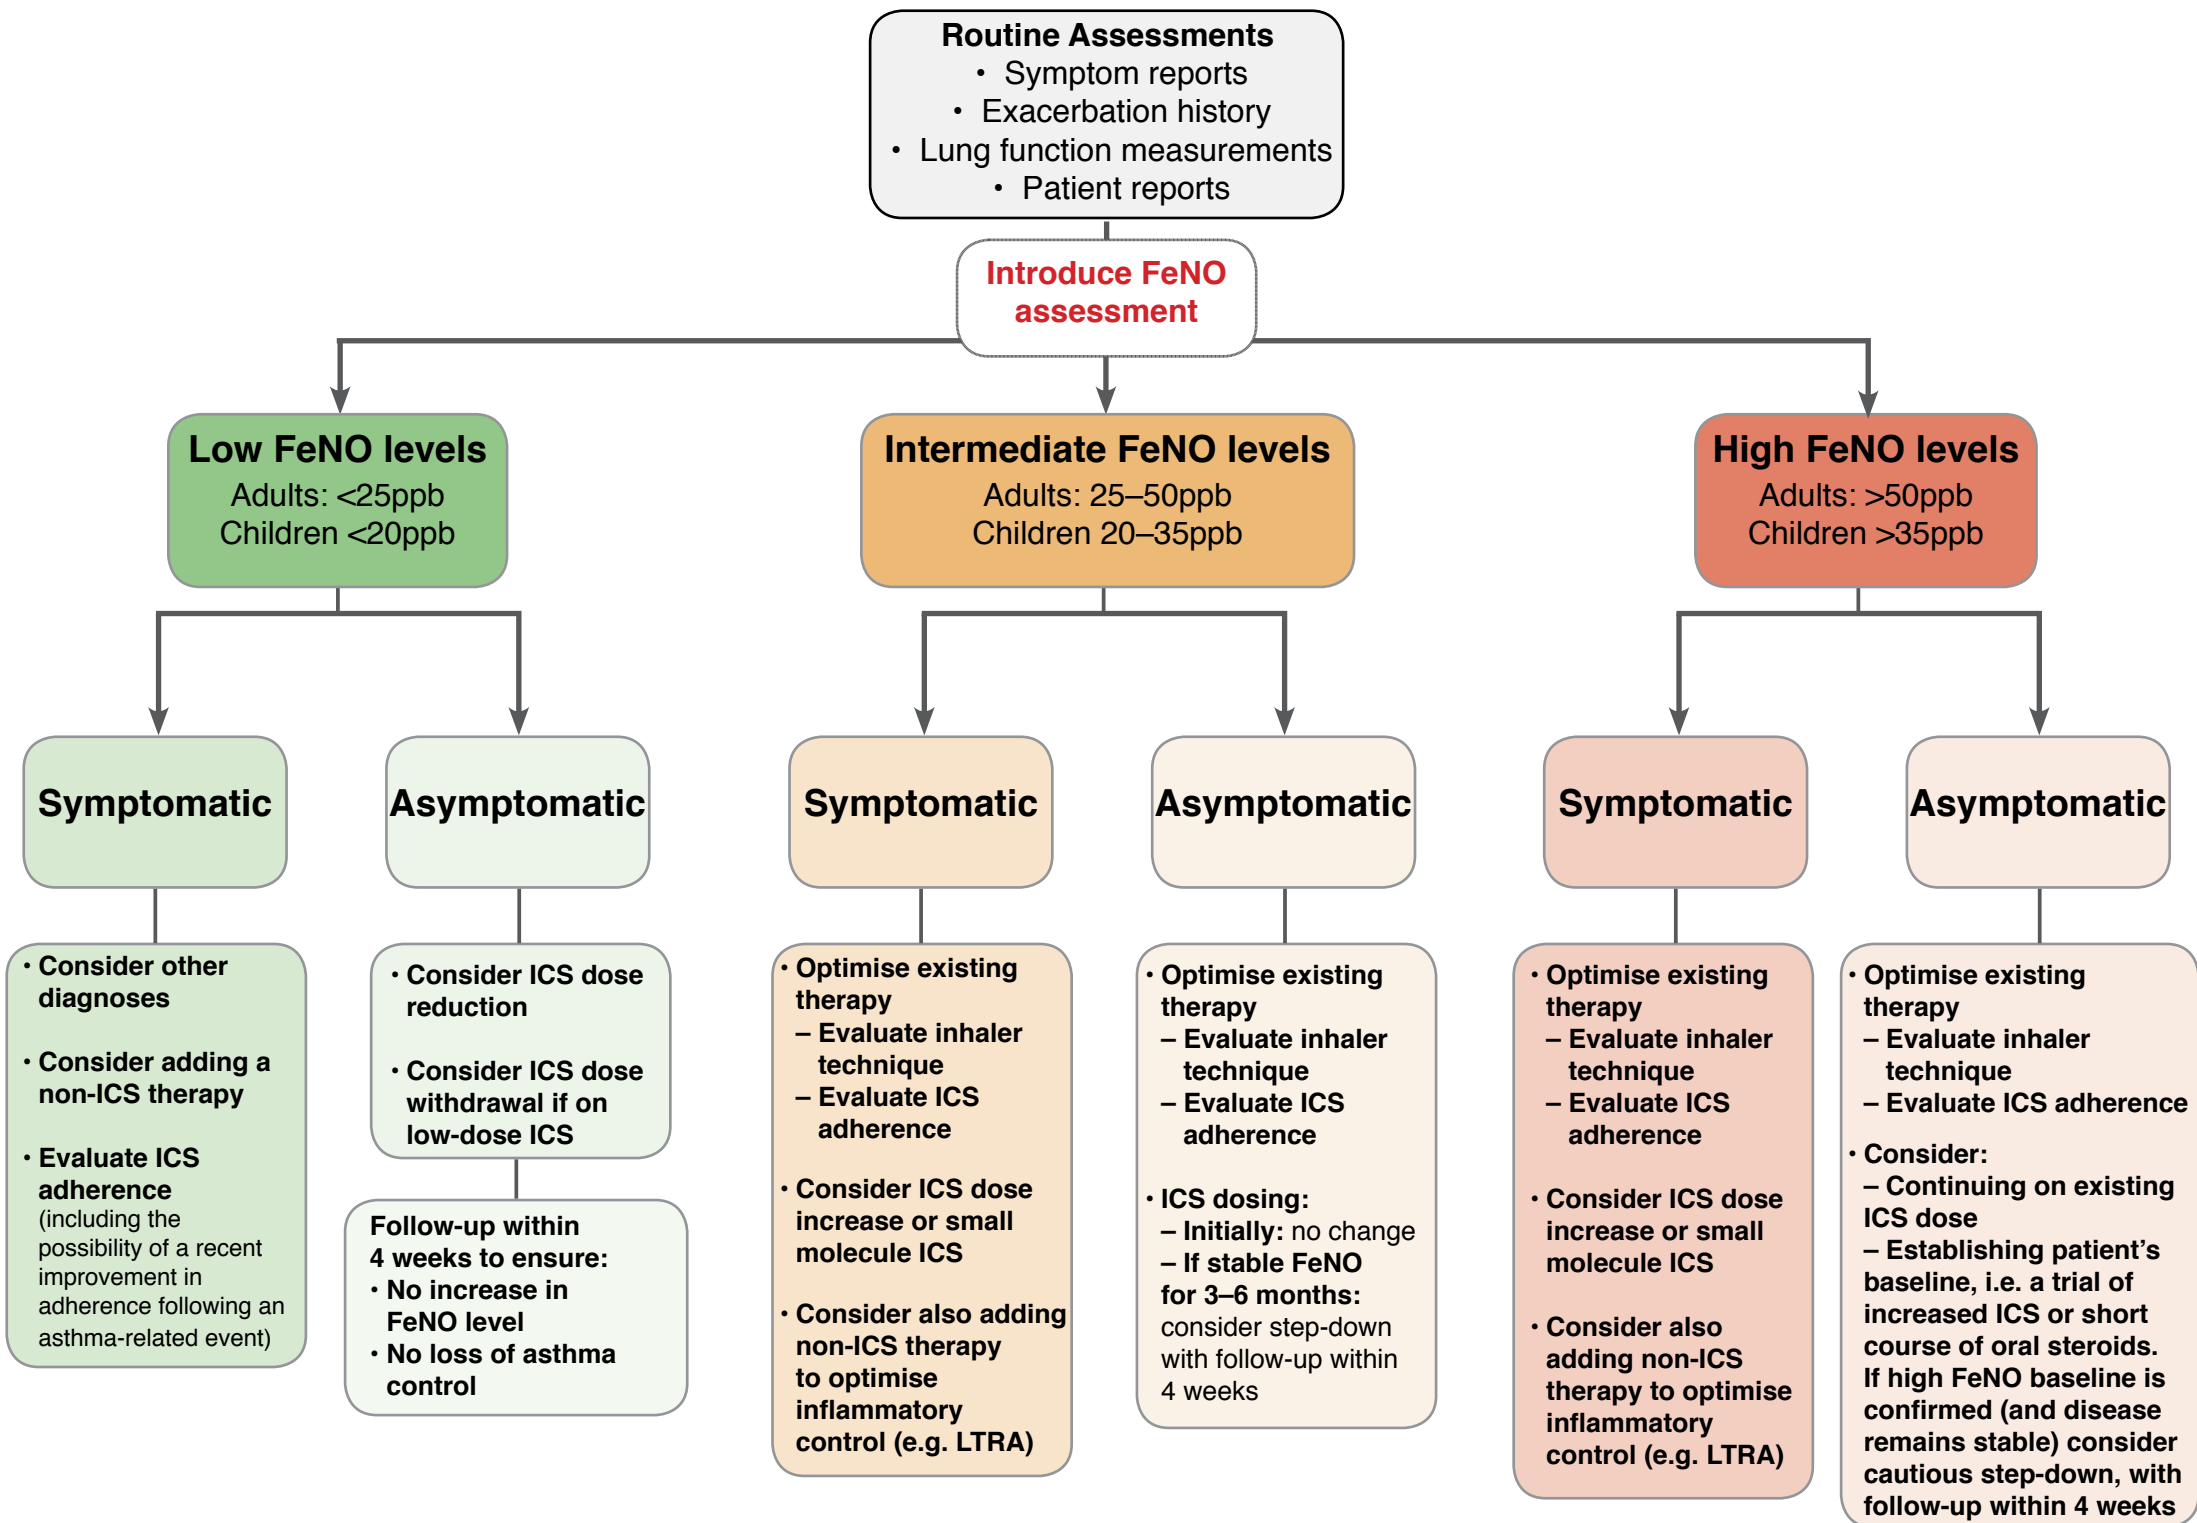

Supplement: MOESM5 [file 9677908]
